# Supplementary material for: Improved performance of perovskite light-emitting diodes with a NaCl doped PEDOT:PSS hole transport layer
Source: Royal Society of Chemistry journal article supplement (doi:10.1039/d0tc06058e), 2021-01-01
Supplement: d0tc06058e1.pdf [file d0tc06058e1.pdf]

# Supporting Information: Improved performance of blue perovskite light-emitting diodes with a NaCl doped PEDOT: PSS hole transport layer

*Xiaokun Huang<sup>a,b,c</sup>, Rainer Bäuerle<sup>a,d</sup>, Felix Scherz<sup>a,c</sup>, Jean-Nicolas Tisserant<sup>a</sup>, Wolfgang Kowalsky<sup>a,b,c</sup>, Robert Lovrinčić<sup>a,b,e</sup>, and Gerardo Hernandez-Sosa<sup>\*a,f,g</sup>*

<sup>a</sup>InnovationLab, Heidelberg 69115, Germany

<sup>b</sup>Institute for High-Frequency Technology, Braunschweig Technical University, Braunschweig 38106, Germany

<sup>c</sup>Kirchhoff-Institut für Physik, Ruprecht-Karls-Universität Heidelberg, Heidelberg 69120, Germany

<sup>d</sup>Organisch-Chemisches Institut, Ruprecht-Karls-Universität Heidelberg, Heidelberg 69120, Germany

<sup>e</sup>trinamiX GmbH, Ludwigshafen 67063, Germany

<sup>f</sup>Institute of Microstructure Technology, Karlsruhe Institute of Technology, Eggenstein-Leopoldshafen 76344, Germany

<sup>g</sup>Light Technology Institute, Karlsruhe Institute of Technology, Karlsruhe 76131, Germany

## AUTHOR INFORMATION

### Corresponding Author

\*E-mail: [gerardo.sosa@kit.edu](mailto:gerardo.sosa@kit.edu)

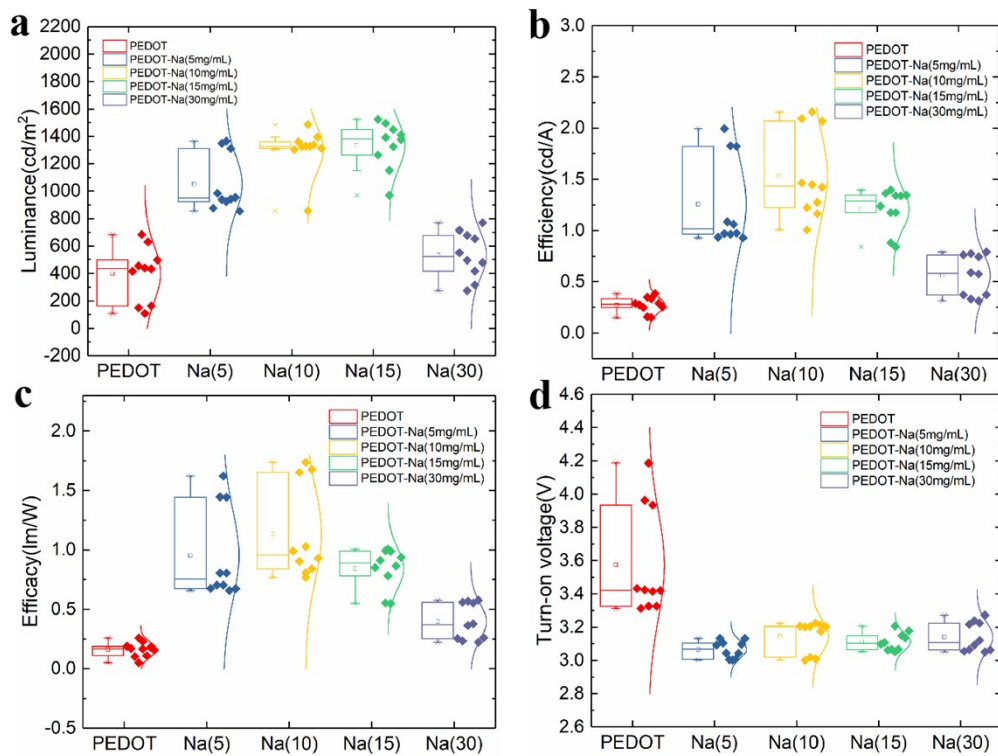

**Figure S1.** Detailed histograms of the device performance with different concentrations of NaCl doping.

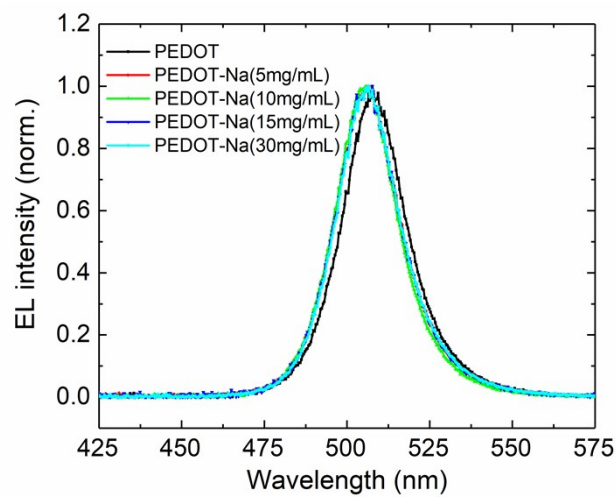

**Figure S2.** Normalized EL spectra of blue PeLEDs with different concentrations of NaCl doping (under the bias of 4V).

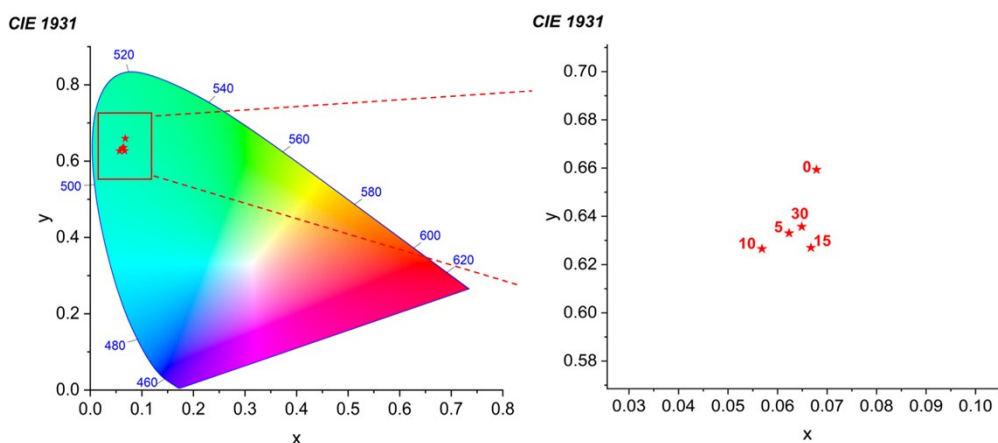

**Figure S3.** CIE coordinates of EL peaks in the manuscript. The labels “0”, “5”, “10”, “15”, and “30” represent the 0, 5, 10, 15, and 30mg/mL NaCl doped PEDOT:PSS, respectively.

**Table S1.** The corresponding numbers of the above CIE coordinates.

| NaCl/mg mL <sup>-1</sup> | 0            | 5            | 10           | 15           | 30           |
|--------------------------|--------------|--------------|--------------|--------------|--------------|
| EL                       | (0.068,0.66) | (0.062,0.63) | (0.057,0.63) | (0.067,0.63) | (0.065,0.64) |

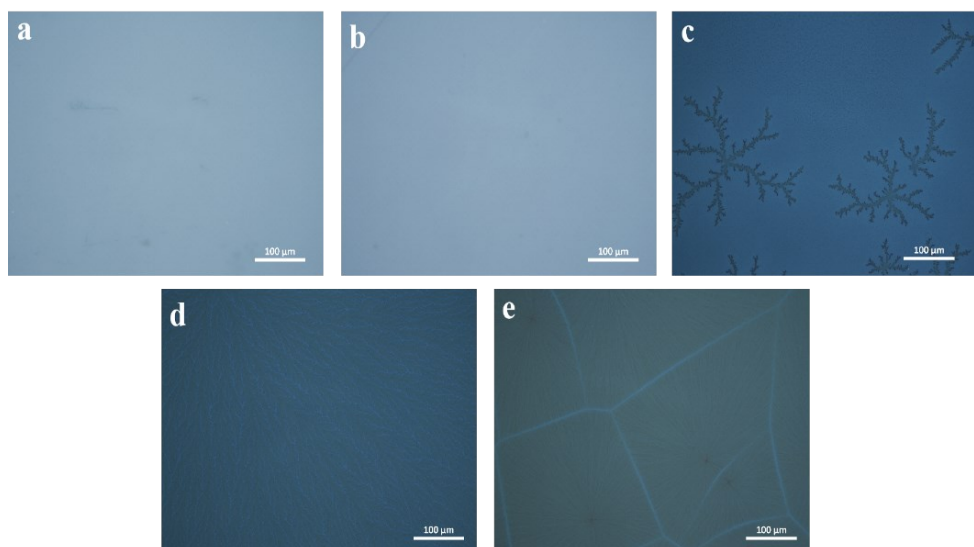

**Figure S4.** The optical microscope images of the PEDOT:PSS films(a), and with NaCl doping of different concentrations(b)5mg/mL, (c)10mg/mL, (d)15mg/mL, (e)30mg/mL.

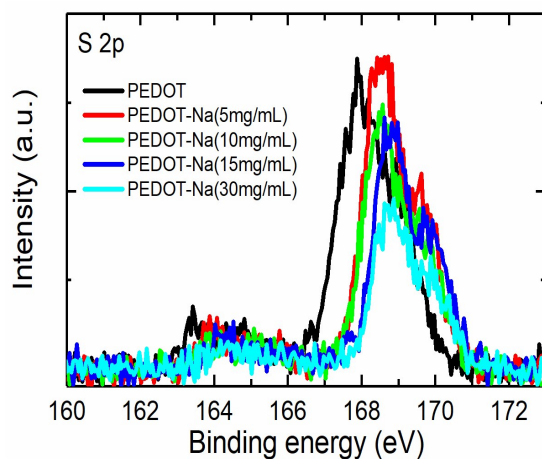

**Figure S5.** XPS spectra of S 2p peaks of the PEDOT:PSS films with different concentrations of NaCl doping.

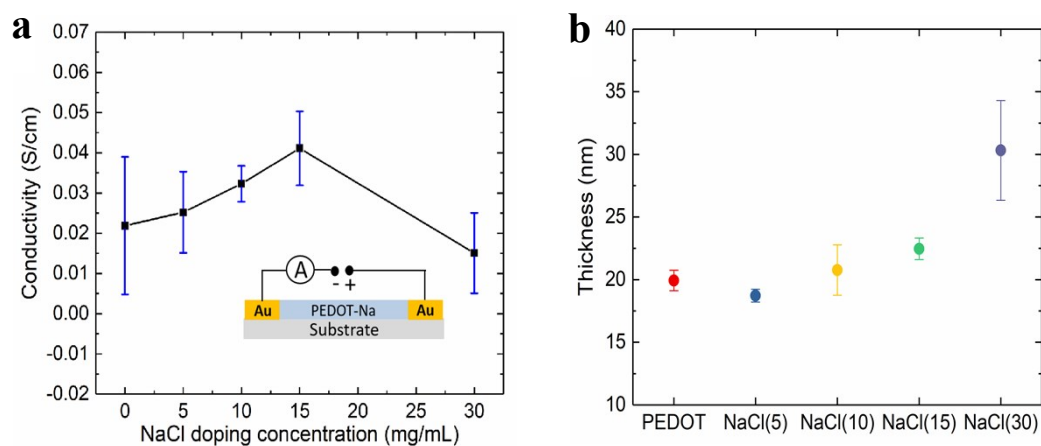

**Figure S6.** (a) Conductivity evolution with the increase of NaCl doping concentration in PEDOT:PSS. (b) Film thicknesses obtained from profilometer measurement, the increased thickness of PEDOT-Na due to precipitated NaCl aggregates on top of PEDOT:PSS layer.

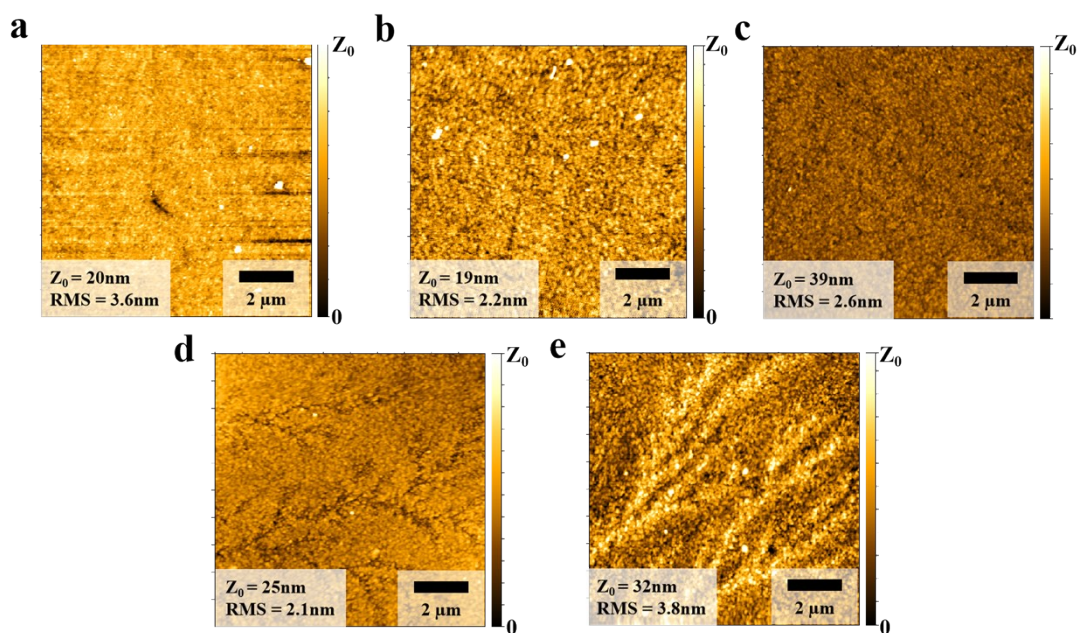

**Figure S7.** The AFM images of the quasi-2D perovskite films deposited on NaCl-doped PEDOT:PSS films of various concentrations.

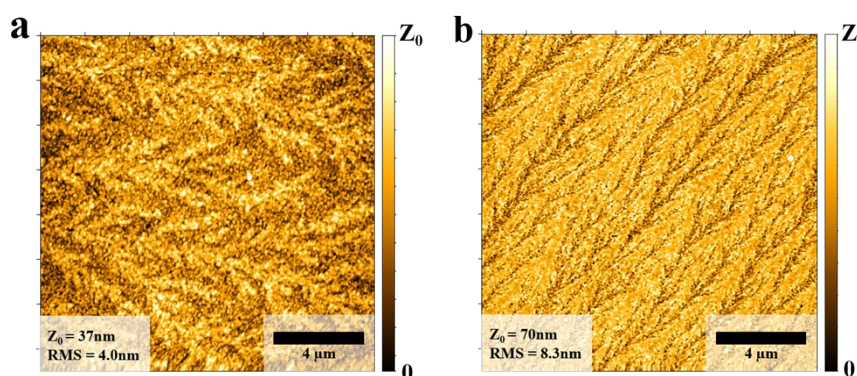

**Figure S8.** AFM images of the DMSO washed PEDOT-Na films. (a) 15mg/mL, (b) 30mg/mL. The DMSO was spin-coated onto the PEDOT-Na films for 2 min.

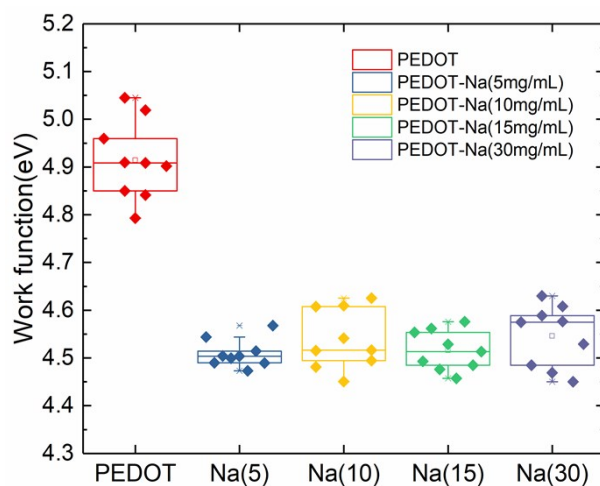

**Figure S9.** Work function measurement of NaCl-doped PEDOT:PSS films with various concentrations by ambient Kelvin Probe. The  $\sim 0.4\text{eV}$  reduction confirmed that the work function of PEDOT:PSS was reduced after NaCl doping, in accordance with the XPS valence band spectra.
